# Supplementary material
Source: publisher figshare collection journal article supplement (https://frontiersin.figshare.com/ndownloader/files/23337221)
Supplement: Supplementary file [file 23337221]

**A**

**Unweighted unifracs**  
(Permanova = 1.53,  $p = 0.001$ )

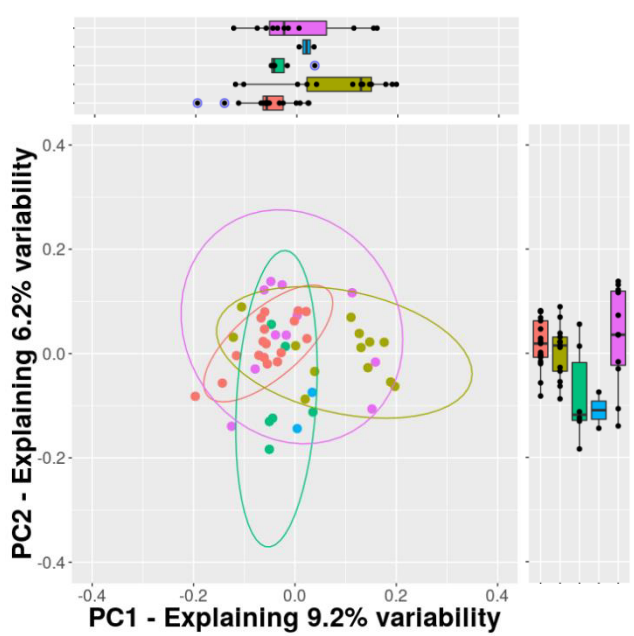

**Weighted unifracs**  
(Permanova = 3.50,  $p = 0.001$ )

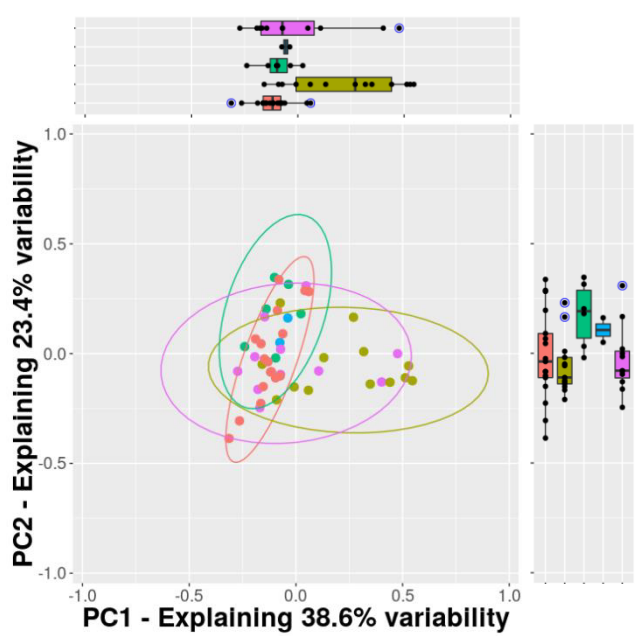

Germany Hungary Netherlands Poland Spain

**B**

**Unweighted unifracs**  
(Permanova = 1.40,  $p = 0.001$ )

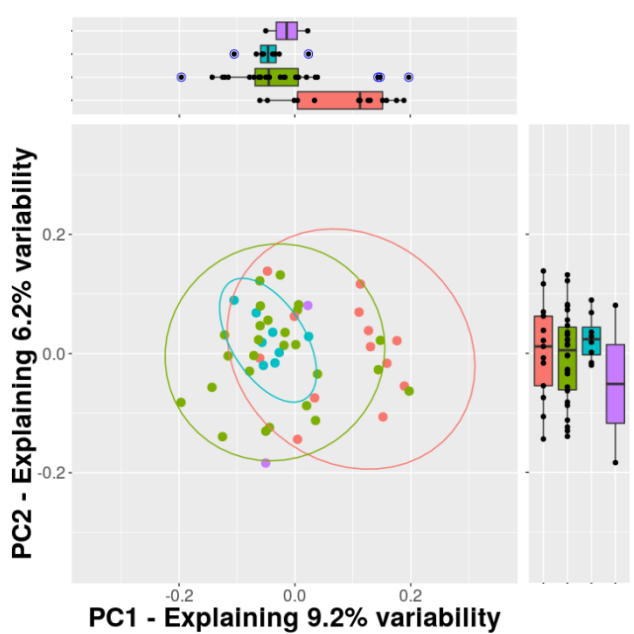

**Weighted unifracs**  
(Permanova = 1.66,  $p = 0.069$ )

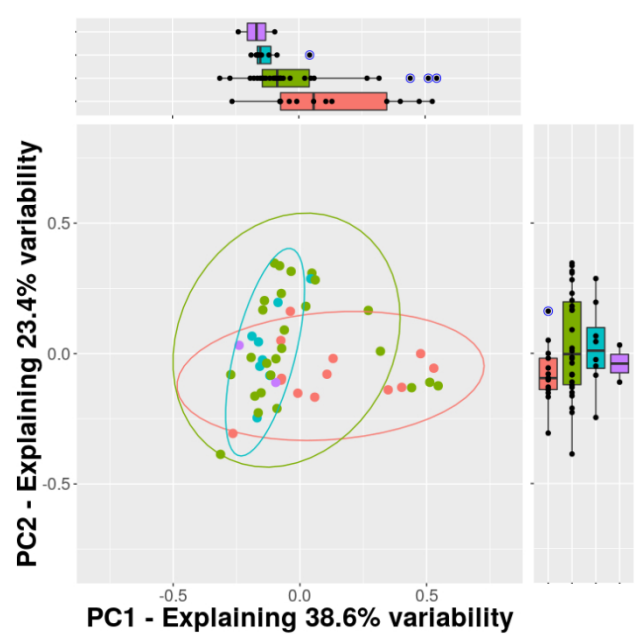

2007 2008 2009 2010
